# Supplementary material for: A multiscale hierarchical architecture of a SiC whiskers–graphite nanosheets/polypyrrole ternary composite for enhanced electromagnetic wave absorption
Source: Royal Society of Chemistry journal article supplement (doi:10.1039/c8tc03683g), 2018-01-01
Supplement: c8tc03683g1.pdf [file c8tc03683g1.pdf]

# **Multiscale hierarchical architecture of SiC whiskers-graphite nanosheets/polypyrrole ternary composite for enhanced electromagnetic wave absorption**

**Shun Dong<sup>1</sup>, Xinghong Zhang<sup>1,\*</sup>, Wenzheng Zhang<sup>2</sup>, Jiecai Han<sup>1</sup>, Ping Hu<sup>1,\*</sup>**

<sup>1</sup>Science and Technology on Advanced Composites in Special Environment Laboratory, Harbin Institute of Technology, Harbin 150001, PR China

<sup>2</sup>School of Materials Science and Engineering, Harbin University of Science and Technology, Harbin 150001, PR China

*\*Corresponding author: Tel/fax: +86 451 86403016.*

**E-mail address: zhangxh@hit.edu.cn (X.H. Zhang); Hupinghit88@163.com (P. Hu)**

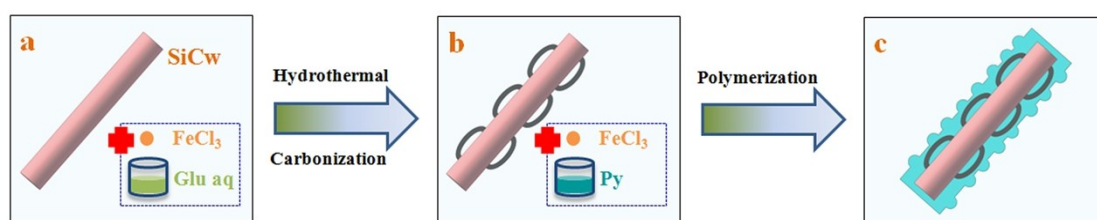

**Fig. S1** Schematic illustration of the preparation processes of SiCw-GNs and SiCw-GNs/PPy heterostructures.

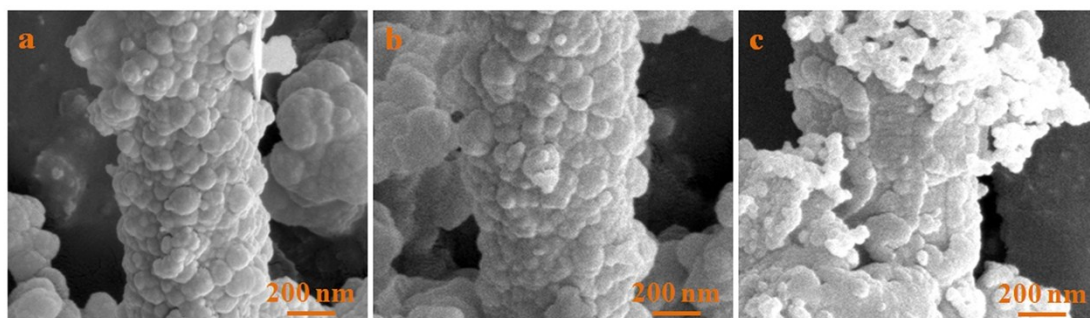

**Fig. S2** A closer examination of the surface states of SiCw-GNs/PPy with the increase of immersing time. (a) 0.5h, (b) 1.0 h and (c) 1.5 h.

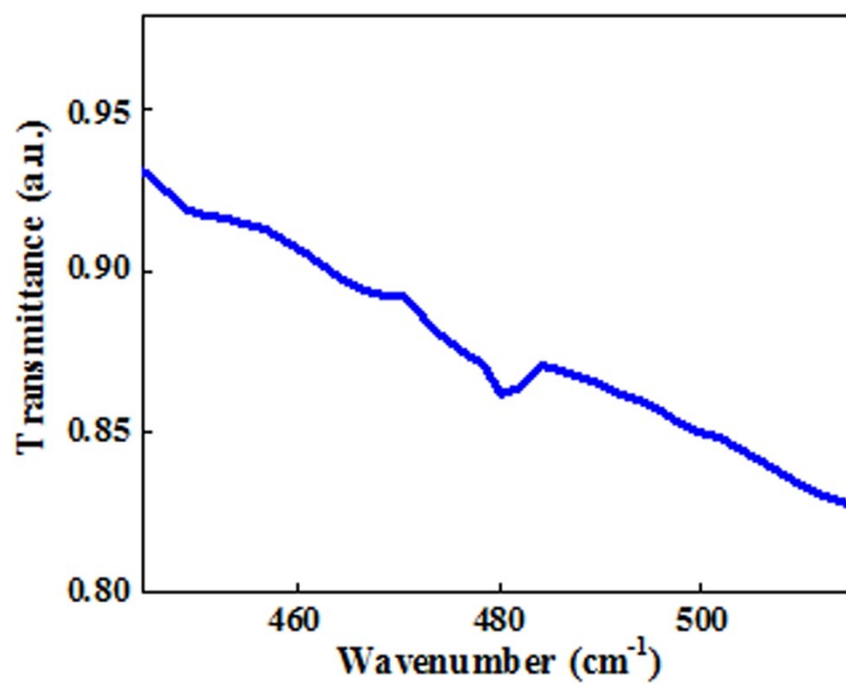

**Fig. S3** A closer examination of FT-TR spectrum of S-5-0.5 located at 450-520 cm<sup>-1</sup> wavelength.

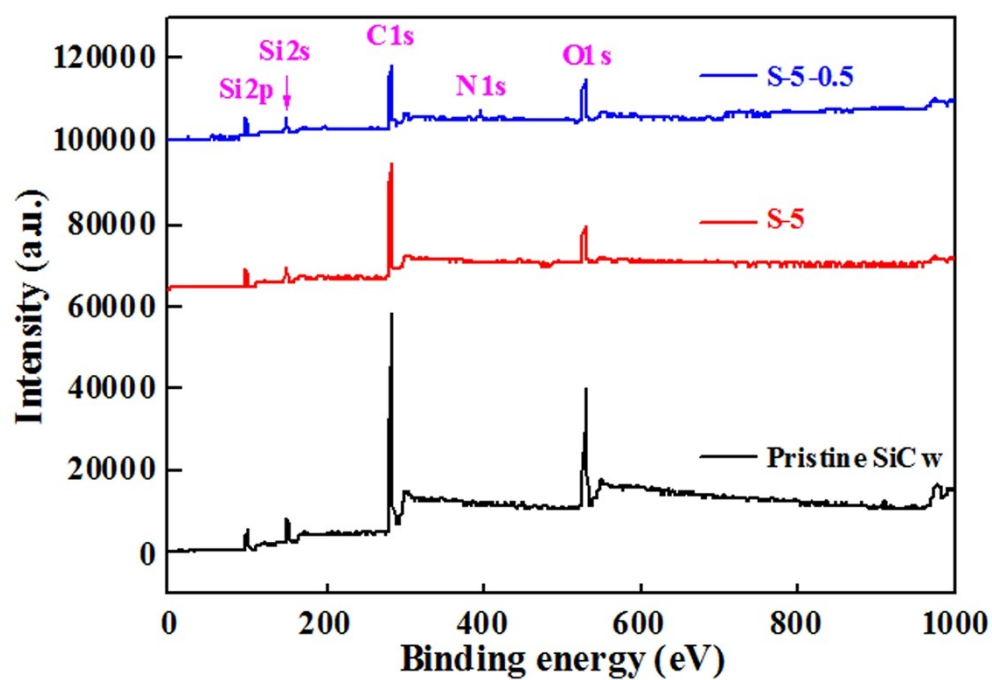

**Fig. S4** Survey spectra of pristine SiCw, SiCw-GNs and SiCw-GNs/PPy heterostructures.

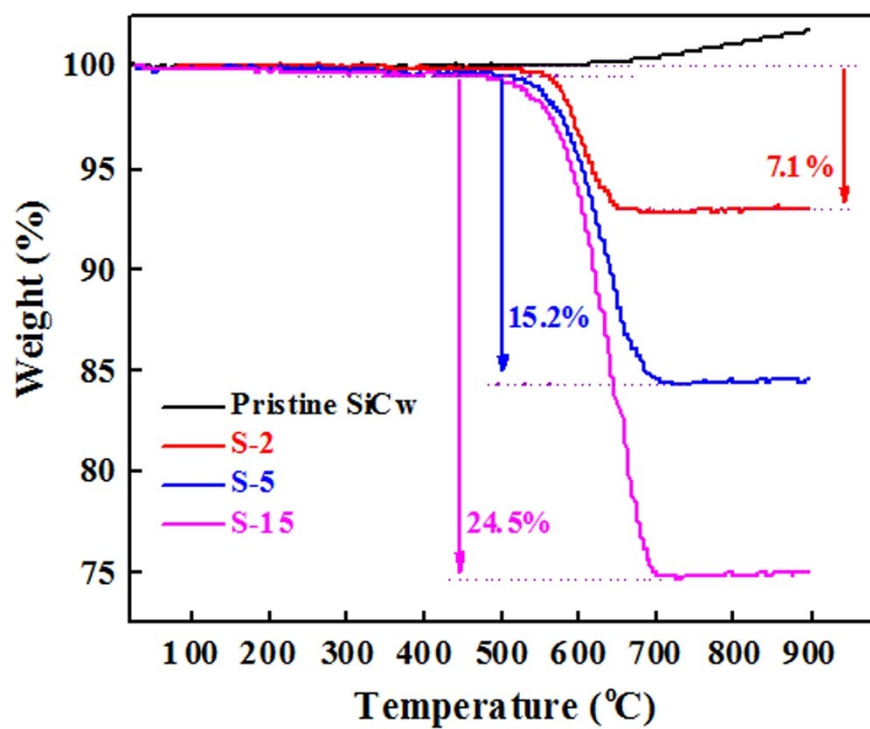

**Fig. S5** TG curves of pristine SiCw and SiCw-GNs heterostructures with different mass ratios of glucose (2, 5 and 15 wt.% labeled as S-2, S-5 and S-15).

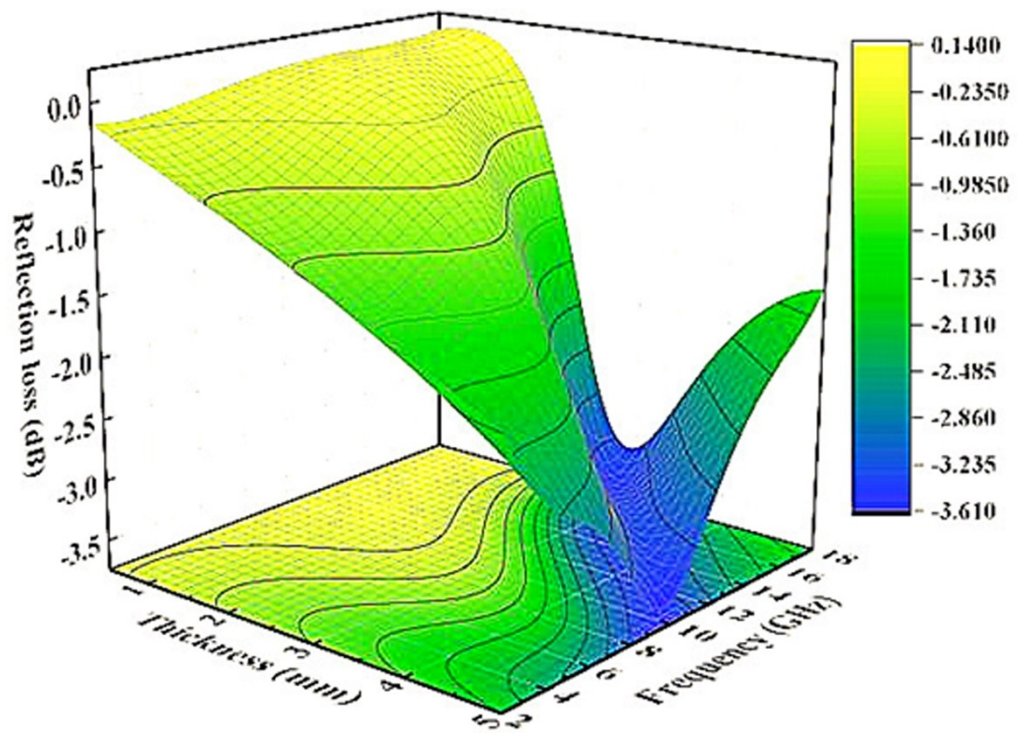

**Fig. S6** The three-dimensional presentation of RL of pristine SiCw.

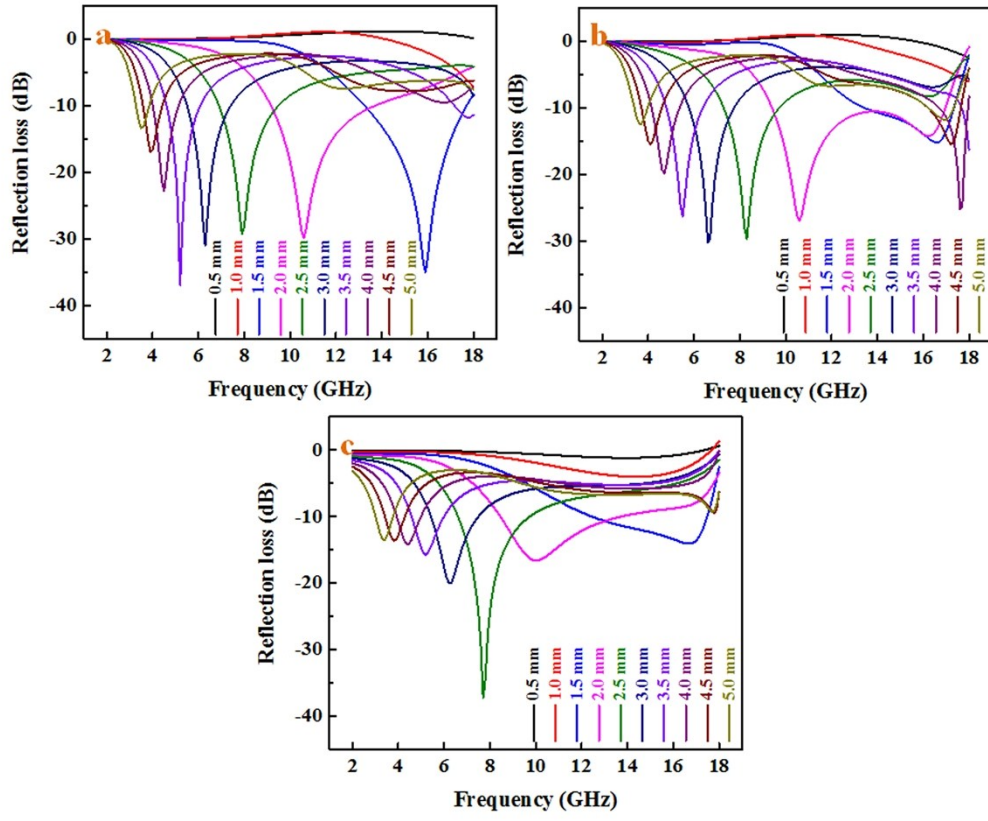

**Fig. S7** The theoretical curves of EM wave RL curves of SiCw-GNs/PPy composites with polymerization times (a) 0.5 h, (b) 1.0 h and (c) 1.5 h (S-2-0.5, S-2-1.0 and S-2-1.5), respectively.

**Table S1** Comparison of EM wave absorption performance of different EM absorbers in recent literatures.

| Absorber                               | Minimal RL value (dB) | Absorption bandwidth |                        | Ref       |
|----------------------------------------|-----------------------|----------------------|------------------------|-----------|
|                                        |                       | RL≤-10 dB (GHz)      | Optimum thickness (mm) |           |
| PPy microparticles                     | -15.1                 | 5.48 (12.52-18)      | 2.0                    | 48        |
| 3D PPy aerogel                         | -35                   | 6.2 (10.72-16.92)    | 2.5                    | 49        |
| PPy-SiCNWs                             | -20                   | 6.52 (10.52-17.04)   | 2.5                    | 31        |
| Fe <sub>3</sub> O <sub>4</sub> -SiCNWs | -51                   | 4.1                  | 3.0                    | 16        |
| Co-SiCNWs                              | -25                   | 6.6 (10-16.6)        | 2.1-2.5                | 50        |
| Fe-SiC fibers                          | -46.3                 | 5.6 (4-9.6)          | 2.25                   | 15        |
| Fe-doping SiCw                         | -21.2                 | 2.6 (9.8-12.4)       | 2.0                    | 21        |
| ZnO-SiCNWs                             | -42.1                 | 4.48                 | 3.5                    | 22        |
| SiCNWs                                 | -31.7                 | 2.5                  | 2.0                    | 51        |
| C-SiCNWs                               | -27.8                 | 4.7                  | 1.7                    | 52        |
| S-5                                    | -7.62                 | -                    | -                      | This work |
| S-15                                   | -6.88                 | -                    | -                      |           |
| Pristine S-2                           | -10.8                 | 1.5 (16.5-18.0)      | 2.54                   |           |
| S-2-0.5PPy                             | -54.4                 | 5.2 (9.9-15.1)       | 1.89                   |           |
| S-2-1.0PPy                             | -64.2                 | 7.6 (9.3-16.9)       | 2.02                   |           |
| S-2-1.5PPy                             | -58.6                 | 7.9 (9.7-17.6)       | 1.8                    |           |
| S-2                                    |                       |                      |                        |           |
